# Supplementary material for: The role of primary lymph node sites in survival and mortality prediction in Hodgkin lymphoma: a SEER population‐based retrospective study
Source: PubMed Central journal article supplement (PMC5911631; doi:10.1002/cam4.1280), 2018-03-09
Supplement: CAM4-7-953-s001.pdf [file CAM4-7-953-s001.pdf]

The role of primary lymph node sites in survival and mortality prediction in Hodgkin Lymphoma: A SEER population-based retrospective study.

Supplementary materials for online publication

**Supplementary table 1: Ann Arbor staging criteria based on EOD\* 10 - extent (1988-2003); CS\*\* extension (2004+); EOD 4 - extent (1983-1987) according to the SEER database:**

|                                                |
|------------------------------------------------|
| <b>Stage I</b>                                 |
| 1983-1987: EOD 4 - extent (1983-1987) = 1      |
| 1988-2003: EOD 10 - extent (1988-2003) = 10-11 |
| 2004+: CS extension (2004+) = 100-120          |
| <b>Stage II</b>                                |
| 1983-1987: EOD 4 - extent (1983-1987) = 2      |
| 1988-2003: EOD 10 - extent (1988-2003) = 20-21 |
| 2004+: CS extension (2004+) = 200-230          |
| <b>Stage III</b>                               |
| 1983-1987: EOD 4 - extent (1983-1987) = 3      |
| 1988-2003: EOD 10 - extent (1988-2003) = 30-33 |
| 2004+: CS extension (2004+) = 300-330          |
| <b>Stage IV</b>                                |
| 1983-1987: EOD 4 - extent (1983-1987) = 8      |
| 1988-2003: EOD 10 - extent (1988-2003) = 80    |
| 2004+: CS extension (2004+) = 800              |
| <b>Unknown</b>                                 |
| All other values                               |

\*Extent of Disease

\*\*Clinical Stage

**Supplementary Table 2 : Time-interval overall survival (OS) and cancer-specific survival (CSS) across all patient characteristics using the Kaplan-Meier (KM) curves: NLPHL=Nodular Lymphocytic Predominant Hodgkin Lymphoma, LR= Lymphocyte-rich, LD= Lymphocyte-depleted, MC= Mixed cellularity, NS= Nodular sclerosis, cHL= classical Hodgkin Lymphoma, LN= Lymph Nodes, HFN= Head, face, and neck, IT= Intrathoracic, IAB= Intra-abdominal, AA= Axilla or arm, IL= Inguinal region or leg, P= Pelvic, Other\*= Includes American Indian, AK Native, Asian, and Pacific Islander, Not married\*\*= Includes single, widowed, separated, and divorced.**

| Characteristic                  | 1-year OS          | 5-year OS | 10-year OS | P-value | 1-year CSS | 5-year CSS | 10-year CSS | P-value            |
|---------------------------------|--------------------|-----------|------------|---------|------------|------------|-------------|--------------------|
| <b>Patient age (years)</b>      | <b>&lt; 0.0001</b> |           |            |         |            |            |             | <b>&lt; 0.0001</b> |
| ≤ 20                            | 0.9917             | 0.96      | 0.9373     |         | 0.9947     | 0.9677     | 0.9536      |                    |
| 21-40                           | 0.9811             | 0.9243    | 0.8897     |         | 0.9873     | 0.9427     | 0.9236      |                    |
| 41-60                           | 0.9399             | 0.8366    | 0.7311     |         | 0.9599     | 0.8911     | 0.8456      |                    |
| 61-80                           | 0.7724             | 0.5511    | 0.3626     |         | 0.834      | 0.6839     | 0.6146      |                    |
| ≥ 81                            | 0.5276             | 0.2215    | 0.045      |         | 0.6463     | 0.4533     | 0.278       |                    |
| <b>Year of diagnosis</b>        | <b>&lt; 0.0001</b> |           |            |         |            |            |             | <b>&lt; 0.0001</b> |
| 1983-1987                       | 0.9065             | 0.7809    | 0.7009     |         | 0.9297     | 0.8391     | 0.801       |                    |
| 1988-2003                       | 0.93               | 0.8274    | 0.7532     |         | 0.9525     | 0.8842     | 0.8541      |                    |
| 2004-2010                       | 0.9248             | 0.8501    | N/A        |         | 0.9467     | 0.8974     | N/A         |                    |
| <b>Patient gender</b>           | <b>&lt; 0.0001</b> |           |            |         |            |            |             | <b>0.4496</b>      |
| Male                            | 0.9269             | 0.8206    | 0.7364     |         | 0.9511     | 0.8832     | 0.8467      |                    |
| Female                          | 0.9239             | 0.8377    | 0.7733     |         | 0.944      | 0.8814     | 0.8563      |                    |
| <b>Race</b>                     | <b>0.0029</b>      |           |            |         |            |            |             | <b>0.0648</b>      |
| White                           | 0.9248             | 0.8276    | 0.753      |         | 0.9474     | 0.8825     | 0.8519      |                    |
| Black                           | 0.9333             | 0.8276    | 0.7473     |         | 0.9524     | 0.877      | 0.8388      |                    |
| Other*                          | 0.9083             | 0.8103    | 0.7236     |         | 0.9419     | 0.8778     | 0.8385      |                    |
| Unknown                         | 0.9897             | 0.9768    | 0.8966     |         | 0.9897     | 0.9768     | 0.9768      |                    |
| <b>Lymphoma Subtype recoded</b> | <b>&lt; 0.0001</b> |           |            |         |            |            |             | <b>&lt; 0.0001</b> |
| NLPHL                           | 0.9849             | 0.9425    | 0.8754     |         | 0.9945     | 0.9777     | 0.9534      |                    |
| LR                              | 0.9552             | 0.8526    | 0.7702     |         | 0.9776     | 0.9267     | 0.9081      |                    |
| MC                              | 0.8859             | 0.7505    | 0.6462     |         | 0.9206     | 0.8296     | 0.7925      |                    |
| LD                              | 0.6847             | 0.5863    | 0.4333     |         | 0.7249     | 0.6473     | 0.5484      |                    |
| NS                              | 0.9494             | 0.8631    | 0.8021     |         | 0.9655     | 0.9038     | 0.8768      |                    |
| cHL, NOS                        | 0.871              | 0.7586    | 0.6707     |         | 0.9047     | 0.8317     | 0.7831      |                    |
| <b>Radiation therapy</b>        | <b>&lt; 0.0001</b> |           |            |         |            |            |             | <b>&lt; 0.0001</b> |
| Radiotherapy                    | 0.9726             | 0.8904    | 0.8197     |         | 0.9837     | 0.9331     | 0.907       |                    |
| No Radiotherapy                 | 0.8862             | 0.7746    | 0.6926     |         | 0.9177     | 0.8382     | 0.8007      |                    |
| <b>Surgery</b>                  | <b>&lt; 0.0001</b> |           |            |         |            |            |             | <b>&lt; 0.0001</b> |
| Surgery                         | 0.9775             | 0.8982    | 0.8304     |         | 0.9871     | 0.9389     | 0.9149      |                    |
| No Surgery                      | 0.9128             | 0.8106    | 0.7336     |         | 0.9383     | 0.8682     | 0.8351      |                    |
| <b>Sequence number</b>          | <b>&lt; 0.0001</b> |           |            |         |            |            |             | <b>0.0156</b>      |
| One primary only                | 0.9218             | 0.8271    | 0.7655     |         | 0.9447     | 0.8799     | 0.854       |                    |
| First of two or more primaries  | 0.9629             | 0.8412    | 0.6758     |         | 0.9805     | 0.909      | 0.8391      |                    |

| <i>Marital status at diagnosis</i> |               |               | <i>0.008</i>       |               |               | <i>0.475</i>       |  |  |
|------------------------------------|---------------|---------------|--------------------|---------------|---------------|--------------------|--|--|
| <i>Not married**</i>               | <i>0.9228</i> | <i>0.8236</i> | <i>0.7573</i>      | <i>0.9433</i> | <i>0.8753</i> | <i>0.845</i>       |  |  |
| <i>Married</i>                     | <i>0.9288</i> | <i>0.8331</i> | <i>0.7477</i>      | <i>0.9535</i> | <i>0.8905</i> | <i>0.8578</i>      |  |  |
| <i>Stage</i>                       |               |               | <i>&lt; 0.0001</i> |               |               | <i>&lt; 0.0001</i> |  |  |
| <i>Unknown</i>                     | <i>0.9135</i> | <i>0.7996</i> | <i>0.7243</i>      | <i>0.9416</i> | <i>0.864</i>  | <i>0.8298</i>      |  |  |
| <i>I</i>                           | <i>0.9452</i> | <i>0.8553</i> | <i>0.7799</i>      | <i>0.9647</i> | <i>0.9087</i> | <i>0.8816</i>      |  |  |
| <i>II</i>                          | <i>0.9374</i> | <i>0.8523</i> | <i>0.7796</i>      | <i>0.9574</i> | <i>0.899</i>  | <i>0.8636</i>      |  |  |
| <i>III</i>                         | <i>0.8962</i> | <i>0.7669</i> | <i>0.6937</i>      | <i>0.9276</i> | <i>0.8297</i> | <i>0.7977</i>      |  |  |
| <i>IV</i>                          | <i>0.7871</i> | <i>0.6352</i> | <i>0.548</i>       | <i>0.8255</i> | <i>0.7018</i> | <i>0.6501</i>      |  |  |
| <i>Primary LN site</i>             |               |               | <i>&lt; 0.0001</i> |               |               | <i>&lt; 0.0001</i> |  |  |
| <i>LN of IL</i>                    | <i>0.8975</i> | <i>0.7477</i> | <i>0.6452</i>      | <i>0.9293</i> | <i>0.8257</i> | <i>0.7723</i>      |  |  |
| <i>LN of HFN</i>                   | <i>0.9517</i> | <i>0.8685</i> | <i>0.7945</i>      | <i>0.9688</i> | <i>0.9173</i> | <i>0.8888</i>      |  |  |
| <i>IT LNs</i>                      | <i>0.9383</i> | <i>0.8522</i> | <i>0.7932</i>      | <i>0.9559</i> | <i>0.8892</i> | <i>0.8595</i>      |  |  |
| <i>IAB LNs</i>                     | <i>0.7001</i> | <i>0.5589</i> | <i>0.4323</i>      | <i>0.7532</i> | <i>0.6384</i> | <i>0.5769</i>      |  |  |
| <i>LN of AA</i>                    | <i>0.8968</i> | <i>0.7621</i> | <i>0.6896</i>      | <i>0.9307</i> | <i>0.8405</i> | <i>0.8157</i>      |  |  |
| <i>P LNs</i>                       | <i>0.7781</i> | <i>0.6695</i> | <i>0.5565</i>      | <i>0.8114</i> | <i>0.7464</i> | <i>0.6932</i>      |  |  |

**Supplementary figure 2: Kaplan-Meier Curves for OS based on all included basic patient characteristics:**

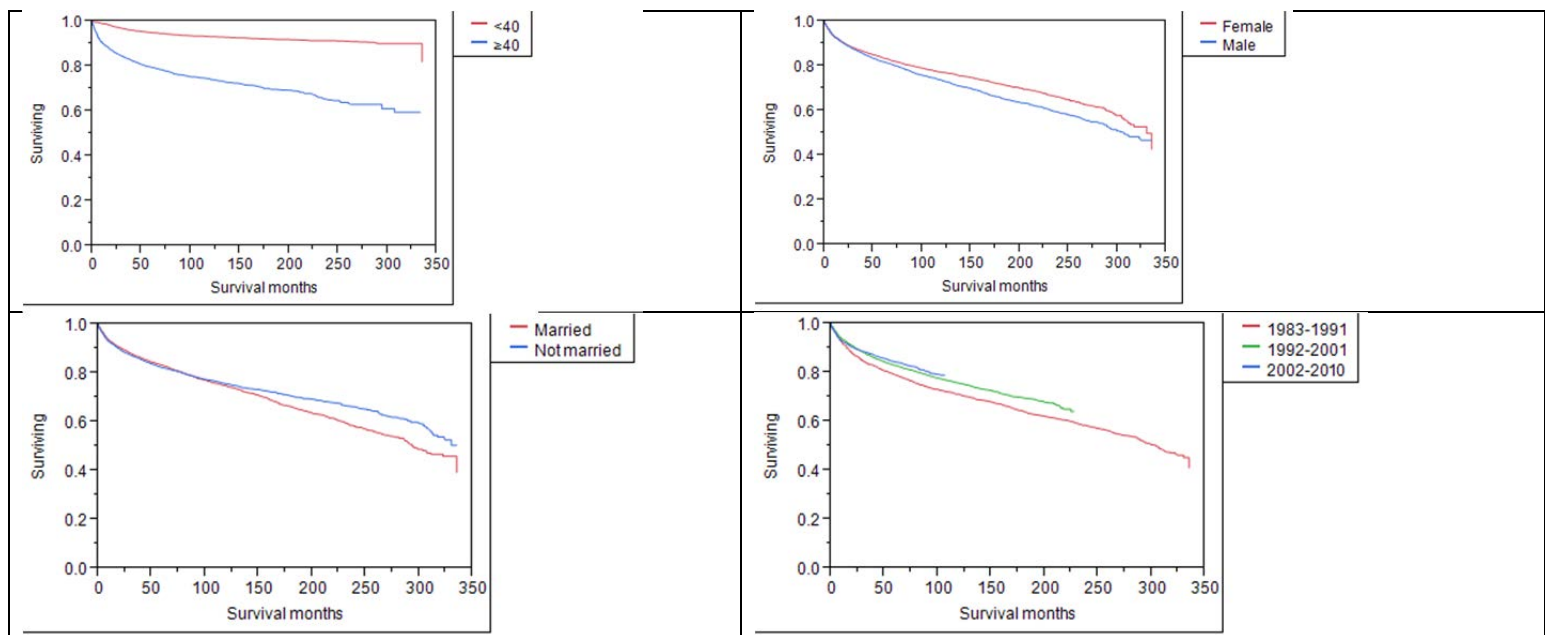

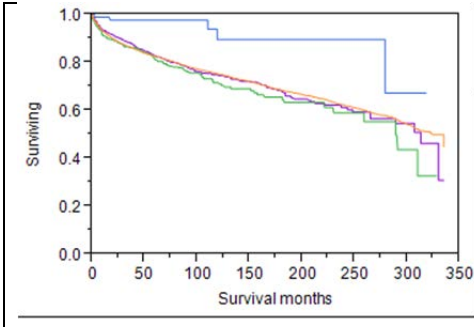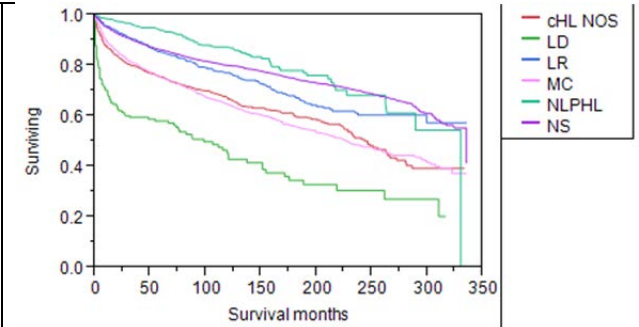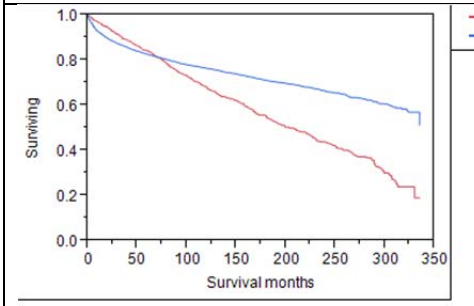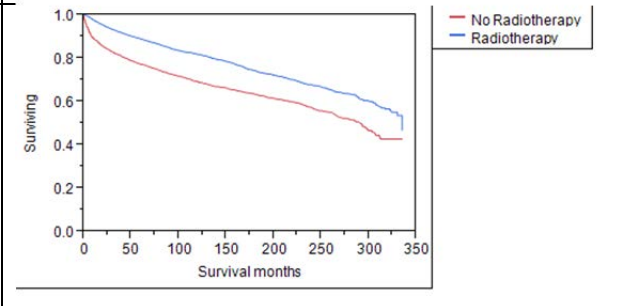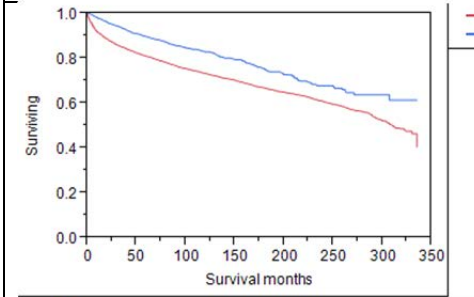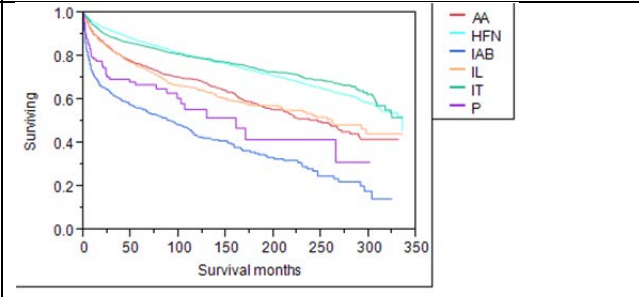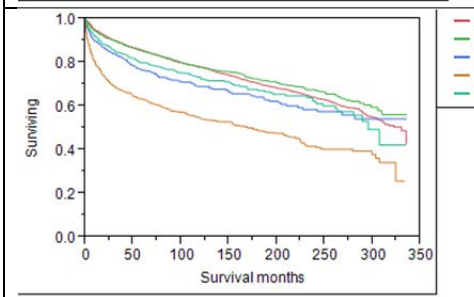

All Log Rank tests are statistically significant for different levels of the study cohort characteristics.

**Figure 3: Kaplan-Meier Curves for CSS based on all included basic patient characteristics:**

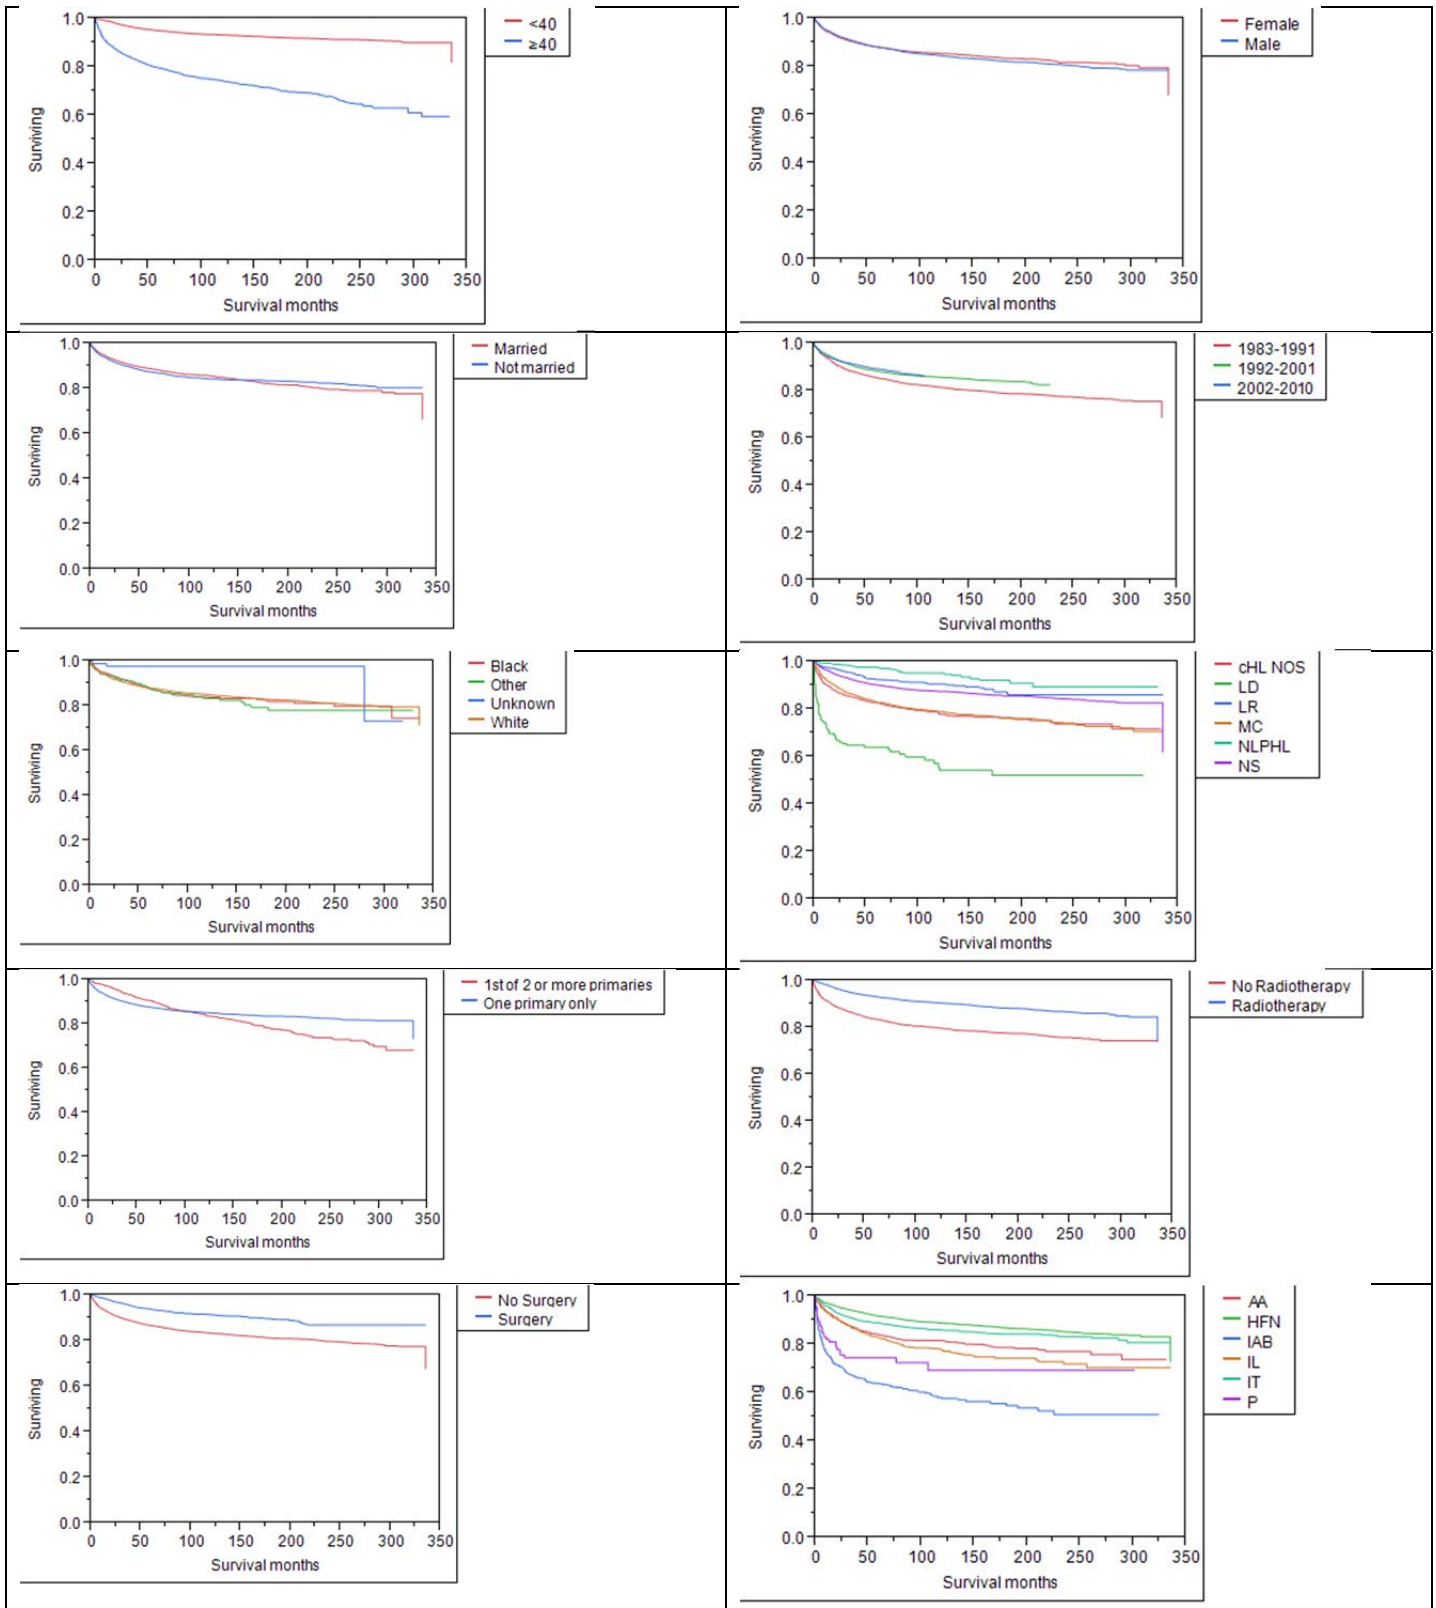

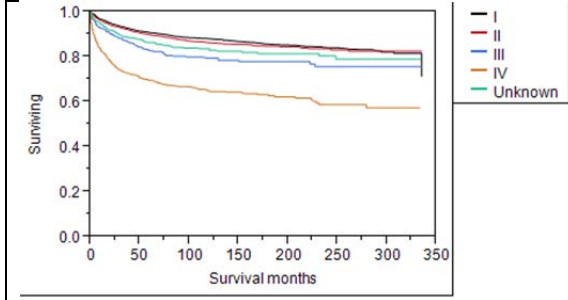

Log Rank tests resembling different levels of the study cohort characteristics were statistically significant with the exception of patients' gender, race, and marital status.
